# Supplementary material
Source: PubMed Central journal article supplement (PMC4589478)
Supplement: NIHMS710736-supplement-Permission.pdf [file NIHMS710736-supplement-Permission.pdf]

**From:** [Vexler, Zena](#)  
**To:** [Kate Bifolck](#)  
**Subject:** RE: STROKE/2014/007776R2: Request Final Files FW: Permission to publish figure [ ref:\_00DU0Ifis.\_500U0LUt0k:ref ]  
**Date:** Thursday, July 16, 2015 7:38:43 PM

---

Dear Kate,

Below please see permission granted by PLOS to reproduce a portion of a figure from manuscript published by the journal.

Thank you

Zena

Zena Vexler, PhD  
Professor  
Director of Research, Neonatal Brain Disorders Center  
Department of Neurology University California San Francisco  
675 Nelson Rising Lane  
San Francisco, CA 94158-0663  
Office: 415 502-2282  
Lab: 415 502-7282  
<http://bms.ucsf.edu/directory/faculty/zena-vexler-phd>  
<http://profiles.ucsf.edu/zena.vexler>  
<http://vexlerlab.ucsf.edu/>

On 7/6/15, 4:09 AM, "Carina Mallard" <Carina.Mallard@neuro.gu.se> wrote:

>Dear Zena,

>

>See below for response about publishing the Plos Medicine figure. No  
>problem as long there is a citation to the original publication.

>Best

>Carina

>

>On 06-07-2015 13:05, "PLOS Medicine" <plosmedicine@plos.org> wrote:

>

>>Dear Dr. Mallard,

>>

>>Thank you for your email requesting re-use of a figure published in PLOS  
>>Medicine. Everything published at PLOS is done so under a CC-BY licence  
>>or better. This means that all figures from the journal can be re-used so  
>>long as the original author and source is correctly cited in your paper.

>>

>>Please see <http://journals.plos.org/plosmedicine/s/content-license> for  
>>more information. If you need anything else from us please let us know,  
>>otherwise good luck with your publication at Stroke.

>>

>>Kind Regards,

>>

>>Hugh

>>

>>PLOS I OPEN FOR DISCOVERY

>>Hugh O'Brien I Senior Publications Assistant, PLOS Medicine

>>Carlyle House, Carlyle Road, Cambridge CB4 3DN | United Kingdom  
>>hobrien@plos.org | Main +44 (0) 1223-442810 | Direct +44 (0) 1223-442844  
>>  
>>California (U.S.) corporation #C2354500, based in San Francisco  
>>  
>>Case Number: 04029482  
>>ref:\_00DU0Ifis.\_500U0LUt0k:ref  
>
